# Supplementary material for: Adherence to Acromegaly Treatment and Analysis of the Related Factors—A Real-World Study in Bulgaria
Source: MDPI journal article supplement (doi:10.3390/pharmaceutics15020438), 2023-01-28
Supplement: s1 [file s1]

*In English language*

## **1. Medication adherence**

### **Morisky Medication-Taking Adherence Scale-MMAS (4-item)**

*(Please check one box on each line)*

- |                                                                                                               | <i>Yes</i>            | <i>No</i>             |
|---------------------------------------------------------------------------------------------------------------|-----------------------|-----------------------|
| 1. Do you ever forget to take your (name of health condition) medicine?                                       | <input type="radio"/> | <input type="radio"/> |
| 2. Do you ever have problems remembering to take your (name of health condition) medication?                  | <input type="radio"/> | <input type="radio"/> |
| 3. When you feel better, do you sometimes stop taking your (name of health condition) medicine?               | <input type="radio"/> | <input type="radio"/> |
| 4. Sometimes if you feel worse when you take your (name of health condition) medicine, do you stop taking it? | <input type="radio"/> | <input type="radio"/> |

Source:

Beyhaghi H, Reeve BB, Rodgers JE, Stearns SC. Psychometric Properties of the Four-Item Morisky Green Levine Medication Adherence Scale among Atherosclerosis Risk in Communities (ARIC) Study Participants. *Value Health*. 2016 Dec;19(8):996-1001. doi: 10.1016/j.jval.2016.07.001. Epub 2016 Aug 31. PMID: 27987650; PMCID: PMC5287458.

## 2. Quality of Life Questionnaires

### EQ-5D-3L

#### **MOBILITY**

- I have no problems in walking about ☐
- I have some problems in walking about ☐
- I am confined to bed ☐

#### **SELF-CARE**

- I have no problems with self-care ☐
- I have some problems washing or dressing myself ☐
- I am unable to wash or dress myself ☐

#### **USUAL ACTIVITIES** (e.g. work, study, housework, family or leisure activities)

- I have no problems with performing my usual activities ☐
- I have some problems with performing my usual activities ☐
- I am unable to perform my usual activities ☐

#### **PAIN / DISCOMFORT**

- I have no pain or discomfort ☐
- I have moderate pain or discomfort ☐
- I have extreme pain or discomfort ☐

#### **ANXIETY / DEPRESSION**

- I am not anxious or depressed ☐
- I am moderately anxious or depressed ☐
- I am extremely anxious or depressed ☐

Source: <https://euroqol.org>

- We would like to know how good or bad your health is TODAY.
- This scale is numbered from 0 to 100.
- 100 means the best health you can imagine.  
0 means the worst health you can imagine.
- Please mark an X on the scale to indicate how your health is TODAY.
- Now, write the number you marked on the scale in the box below.

YOUR HEALTH TODAY =

The best health  
you can imagine

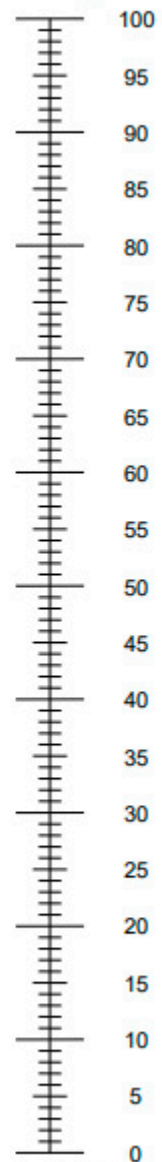

The worst health  
you can imagine

Source: <https://euroqol.org>

### **Short Form-36 (SF-36) Health Survey**

1. In general would you say your health is:

- excellent [1]
- very good [2]
- good [3]
- fair [4]
- poor [5]

2. Compared to one year ago, how would you rate your health in general now?

- much better now than one year ago [1]
- somewhat better now than one year ago [2]
- about the same now as one year ago [3]
- somewhat worse now than one year ago [4]
- much worse now than one year ago [5]

3. The following items are about activities you might do during a typical day. Does your health now limit you in these activities? If so, how much?

- a. Vigorous activities, such as running, lifting heavy objects, participating in strenuous sports.
- b. Moderate activities, such as moving a table, pushing a vacuum cleaner, bowling, or playing golf.
- c. Lifting or carrying groceries.
- d. Climbing several flights of stairs.
- e. Climbing one flight of stairs.
- f. Bending, kneeling, or stooping.
- g. Walking more than one mile.
- h. Walking several blocks.
- i. Bathing or dressing yourself.

Responses

- Yes, limited a lot [1]
- Yes, limited a little [2]
- No, not limited at all [3]

4. During the past 4 weeks, have you had any of the following problems with your work or other regular daily activities as a result of your physical health?

- a. Cut down on the amount of time you spent on work or other activities.
- b. Accomplished less than you would like.
- c. Were limited in the kind of work or other activities.
- d. Had difficulty performing the work or other activities (for example, it took extra effort).

Responses

- Yes [1]
- No [2]

5. During the past 4 weeks, have you had any of the following problems with your work or other regular activities as a result of any emotional problems (such as feeling depressed or anxious)?

- a. Cut down on the amount of time you spent on work or other activities.
- b. Accomplished less than you would like.
- c. Didn't do work or other activities as carefully as usual.

Responses

- Yes [1]
- No [2]

6. During the past 4 weeks, to what extent has your physical health or emotional problems interfered with your normal social activities with family, friends, neighbors, or groups?

- not at all [1]
- slightly [2]
- moderately [3]
- quite a bit [4]
- extremely [5]

7. How much bodily pain have you had during the past 4 weeks?

- none [1]
- very mild [2]
- mild [3]
- moderate [4]
- severe [5]
- very severe [6]

8. During the past 4 weeks, how much did pain interfere with your normal work (including both work outside the home and housework)?

- not at all [1]
- a little bit [2]
- moderately [3]
- quite a bit [4]
- extremely [5]

9. These questions are about how you feel and how things have been with you during the past 4 weeks. For each question, please give the one answer that comes closest to the way you have been feeling. How much of the time during the past 4 weeks:

- a. Did you feel full of pep?
- b. Have you been a very nervous person?
- c. Have you felt so down in the dumps that nothing could cheer you up?
- d. Have you felt calm and peaceful?
- e. Did you have a lot of energy?
- f. Have you felt downhearted and blue?
- g. Did you feel worn out?
- h. Have you been a happy person?
- i. Did you feel tired?

Responses:

- all of the time [1]
- most of the time [2]
- a good bit of the time [3]
- some of the time [4]
- a little of the time [5]
- none of the time [6]

10. During the past 4 weeks, how much of the time has your physical health or emotional problems interfered with your social activities (like visiting with friends, relatives, etc.)?

- all of the time [1]
- most of the time [2]
- some of the time [3]

- a little of the time [4]
- none of the time [5]

11. How TRUE or FALSE is each of the following statements for you?

- a. I seem to get sick a little easier than other people.
- b. I am as healthy as anybody I know.
- c. I expect my health to get worse.
- d. My health is excellent.

Responses

- definitely true [1]
- mostly true [2]
- don't know [3]
- mostly false [4]
- definitely false [5]

*In Bulgarian language*

**1. ОЦЕНКА НИВОТО НА ПРИДЪРЖАНЕ КЪМ ТЕРАПИЯТА**

|                                                                                         |                                                                                                             |
|-----------------------------------------------------------------------------------------|-------------------------------------------------------------------------------------------------------------|
| ВЪПРОСИ:<br>(Моля, сложете отметка на верния отговор)                                   | ОТГОВОРИ: ДА - 0 т.; НЕ - 1т.<br>0 - слабо придържане<br>1-2 - средно придържане<br>3-4 - високо придържане |
| Някога забравяли ли сте да приемате лекарството си?                                     | ДА<br>НЕ                                                                                                    |
| Нередовни ли сте в приема на лекарството си?                                            | ДА<br>НЕ                                                                                                    |
| Случвало ли Ви се е да спрете приема на лекарството си, когато се почувствате по-добре? | ДА<br>НЕ                                                                                                    |
| Случвало ли Ви се е да спрете приема на лекарството си, когато се почувствате по-зле?   | ДА<br>НЕ                                                                                                    |
| РЕЗУЛТАТ:                                                                               |                                                                                                             |

Адаптирано по Four-item Morisky Medication Adherence Scale (MGLS). Hadi Beyhaghi, MD, MPH. Psychometric Properties of the Four-item Morisky Green Levine Medication Adherence Scale among Atherosclerosis Risk in Communities Study (ARIC) Participants. *Value Health*. 2016;19(8):996-1001. doi:10.1016/j.jval.2016.07.001



## **2. ОЦЕНКА КАЧЕСТВОТО НА ЖИВОТ НА ПАЦИЕНТА**

### **EQ-5D-3L**

1. Двигателна активност
  - А) Нямам проблеми при ходене
  - В) Имам някои проблеми при ходене
  - С) Прикован съм на легло
  
2. Самообслужване
  - А) Нямам проблеми със самообслужването
  - В) Имам някои проблеми при измиване и сресване
  - С) Аз не съм в състояние да се мия и сресвам сам
  
3. Обичайни дейности (работа, учене, домашна работа, семейни или спортни дейности)
  - А) Нямам проблеми в извършването на обичайни дейности
  - В) Имам някои проблеми в извършването на обичайни дейности
  - С) Не мога да извършвам обичайни дейности
  
4. Болка/дискомфорт
  - А) Нямам болка или дискомфорт
  - В) Имам поносими болки или дискомфорт
  - С) Имам непоносими болки или дискомфорт
  
5. Подтиснатост/депресия
  - А) Не съм подтиснат или депресиран
  - В) Аз съм малко подтиснат или депресиран
  - С) Аз съм много подтиснат или депресиран

Source: <https://euroqol.org>

За да помогнем на хората да кажат колко е добро или лошо е здравословното им състояние, ние направихме скала, на която най-доброто състояние, което можете да си представите е маркирано със 100 и най-лошото състояние, което можете да си представите, е маркирано с 0.

Бихме искали да посочите в този мащаб колко добро или лошо е вашето здраве днес по ваше мнение.

Моля, направете това, като начертаете линия върху скалата по-долу, в зависимост от това коя точка на скалата показва колко е добро или лошо здравословното ви състояние днес.

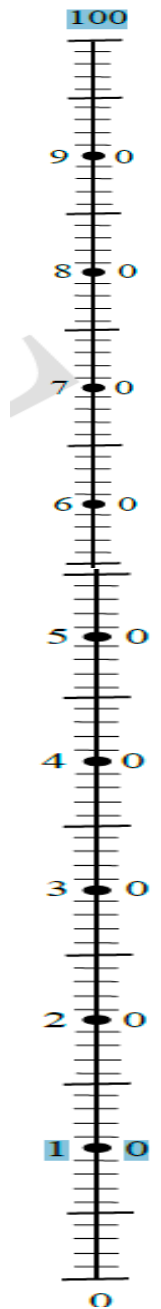

Source: <https://euroqol.org>

### Анкета (SF-36) за оценка на качеството на живот

Изследването има за цел да разбере вашата гледна точка относно здравето ви. Тази информация ще помогне да се проследи как се чувствате и доколко сте способен да извършвате обичайните си дейности.

1. Като цяло бихте ли казали че здравето ви е:

- отлично [1]
- много добро [2]
- добро [3]
- средно [4]
- лошо [5]

2. В сравнение с предходната година, как бихте определили като цяло здравето си сега?

- Много по-добре сега отколкото преди 1 година [1]
- Малко по-добре, отколкото преди 1 година [2]
- Както преди 1 година [3]
- Малко по-зле отколкото преди 1 година [4]
- Много по-зле отколкото преди 1 година [5]

3. По-долу са изброени дейности, които бихте могли да извършвате през един обикновен ден.

Ограничава ли ви здравето в момента да извършвате тези действия и ако ДА до каква степен?

| Дейности                                                                                    | Да, много ме ограничава | Да, малко ме ограничава | Не, не ме ограничава |
|---------------------------------------------------------------------------------------------|-------------------------|-------------------------|----------------------|
| Трудовки дейности, като тичане, вдигане на тежки предмети,<br>участие в екстремни спортове. | 1                       | 2                       | 3                    |
| Нормални дейности като преместване на маса, чистене с прахосмукачка, игра на тенис, футбол. | 1                       | 2                       | 3                    |
| Носене или вдигане на тежести                                                               | 1                       | 2                       | 3                    |
| Изкачване на няколко стъпала.                                                               | 1                       | 2                       | 3                    |
| Изкачване на едно стъпало.                                                                  | 1                       | 2                       | 3                    |
| Навеждане или коленичене.                                                                   | 1                       | 2                       | 3                    |
| Ходене повече от един километър                                                             | 1                       | 2                       | 3                    |
| Да извървите няколко пресечки.                                                              | 1                       | 2                       | 3                    |
| Да се обличате или къпете.                                                                  | 1                       | 2                       | 3                    |

4. През последните четири седмици имали ли сте някои от следните проблеми с изпълнение на работните си задължения или на обичайни дейности, като резултат от физическото ви състояние?

| Дейности                                                                                         | Да | Не |
|--------------------------------------------------------------------------------------------------|----|----|
| Съкращавате време, което отделяте за работа или други занимания, поради физическо неразположение | 1  | 2  |

|                                                                                                       |   |   |
|-------------------------------------------------------------------------------------------------------|---|---|
| Не ви удовлетворява постигнатото                                                                      | 1 | 2 |
| Намалявате работа или други дейности, поради физическо неразположение                                 | 1 | 2 |
| Имали сте затруднения при изпълнение на работа или други дейности (напр. коствало ви е повече усилия) | 1 | 2 |

5. През последните четири седмици, имали ли сте някои от следните проблеми с работата си или с обичайните си дейности, като резултат от емоционални проблеми (депресия или напрегнатост)

| Дейности                                                                                    | Да | Не |
|---------------------------------------------------------------------------------------------|----|----|
| Съкратено време, което отделяте за работа или други занимания, поради психическо напрежение | 1  | 2  |
| Не ви удовлетворява постигнатото                                                            | 1  | 2  |
| Не сте работили или извършвали други занимания така внимателно както обикновено             | 1  | 2  |

6. През последните четири седмици до каква степен вашите здравословни и емоционални проблеми са повлияли на нормалните ви социални активности със семейството, приятелите, съседите или други групи?

- а. Въобще не са ми повлияли [1]
- б. Слабо [2]
- в. До някъде [3]
- г. Доста [4]
- д. Изключително много [5]

7. Каква степен на физическа болка сте изпитвали през последните 4 седмици?

- Никаква [1] премини към въпрос 9
- Съвсем умерена [2]
- Умерена [3]
- Нормални [4]
- Силна [5]
- Много силна [6]

8. През последните четири седмици до каква степен болката е повлияла на нормалната ви работа (като работа извън къщи и домашна работа)

- а. Въобще не ми е повлияла [1]
- б. Слабо [2]
- в. До някъде [3]
- г. Доста [4]
- д. Изключително много [5]

9. Тези въпроси оценяват как се чувствате сега и как сте се чувствали през последните 4 седмици. За всеки въпрос дайте отговор, който максимално се доближава до това как сте се чувствали и каква част от времето през последните 4 седмици:

| Дейности                                                                 | През цялото време | През значителна част от времето | През повечето време | От време на време | През малка част от времето | Изобщо |
|--------------------------------------------------------------------------|-------------------|---------------------------------|---------------------|-------------------|----------------------------|--------|
| Чувствали сте се изпълнен със сила и енергия?                            | 1                 | 2                               | 3                   | 4                 | 5                          | 6      |
| Били ли сте изнервен?                                                    | 1                 | 2                               | 3                   | 4                 | 5                          | 6      |
| Чувствали ли сте се толкова депресиран, че нищо не може да ви развесели? | 1                 | 2                               | 3                   | 4                 | 5                          | 6      |
| Чувствали ли сте се спокоен и уравновесен?                               | 1                 | 2                               | 3                   | 4                 | 5                          | 6      |
| Имали ли сте излишък от енергия?                                         | 1                 | 2                               | 3                   | 4                 | 5                          | 6      |
| Чувствате ли се подтиснат и тъжен?                                       | 1                 | 2                               | 3                   | 4                 | 5                          | 6      |
| Чувствали ли сте се изтощен?                                             | 1                 | 2                               | 3                   | 4                 | 5                          | 6      |
| Били ли сте щастлив?                                                     | 1                 | 2                               | 3                   | 4                 | 5                          | 6      |
| Били ли сте изморен?                                                     | 1                 | 2                               | 3                   | 4                 | 5                          | 6      |

10. През последните четири седмици през каква част от времето вашето емоционално и физическо състояние е повлияло на вашите социални дейности ( като посещение на приятели, роднини и т.н)

- а. През цялото време [1]
- б. През повечето време [2]
- в. Понякога [3]
- г. През малка част от времето [4]
- д. Изобщо [5]

11. Верни или не са следните твърдения за вас?

| Твърдение                                                    | Абсолютно вярно | До голяма степен вярно | Не знам | До голяма степен грешно | Абсолютно грешно |
|--------------------------------------------------------------|-----------------|------------------------|---------|-------------------------|------------------|
| Изглежда се разболявам по-лесно от другите хора              | 1               | 2                      | 3       | 4                       | 5                |
| Аз съм толкова здрав колкото и всеки останал, който познавам | 1               | 2                      | 3       | 4                       | 5                |
| Очаквам здравето ми да се влошава                            | 1               | 2                      | 3       | 4                       | 5                |
| Здравето ми е отлично                                        | 1               | 2                      | 3       | 4                       | 5                |
